# Supplementary material
Source: PubMed Central journal article supplement (PMC7211987)
Supplement: pnas.1913633117.sapp.pdf [file pnas.1913633117.sapp.pdf]

1 **Supplementary Information for**

2

3 **Triptolide suppresses IDH1-mutated malignancy via Nrf2-driven glutathione**  
4 **metabolism**

5

6 Di Yu<sup>1,2,3, #</sup>, Yang Liu<sup>1, #</sup>, Yiqiang Zhou<sup>1</sup>, Victor Ruiz-Rodado<sup>1</sup>, Mioara Larion<sup>1</sup>, Guowang  
7 Xu<sup>2, #</sup>, Chunzhang Yang<sup>1, #</sup>

8

9 #Equal Contribution

10 <sup>1</sup>Neuro-Oncology Branch, Center for Cancer Research, National Cancer Institute, MD,  
11 20892, USA

12 <sup>2</sup>CAS Key Laboratory of Separation Science for Analytical Chemistry, Dalian Institute of  
13 Chemical Physics, Chinese Academy of Sciences, Dalian, 116023, China

14 <sup>3</sup>University of Chinese Academy of Sciences, Beijing, 100049, China

15

16 **Correspondence: Chunzhang Yang, Ph.D.** Investigator, Neuro-Oncology Branch  
17 Center for Cancer Research, NCI, NIH. Building 37, Room 1142E Bethesda, MD 20892.  
18 Phone: +1-240-760-7083. Email: [yangc2@mail.nih.gov](mailto:yangc2@mail.nih.gov)

19

20 **Guowang Xu, Ph.D.** Professor, CAS Key Laboratory of Separation Science for Analytical  
21 Chemistry, DICP, CAS. Building 18, Room 314, Dalian 116023. Phone: 0086-411-  
22 84379530. Email: [xugw@dicp.ac.cn](mailto:xugw@dicp.ac.cn)

23

24 This file includes:

25 Supplementary Methods

26 Figure S1 and S2

27 SI Figure Legends

28

## 1 **Supplementary Methods**

### 2 **Genetic silencing**

3 Small interference RNA oligos targeting SLC7A11 were synthesized by Integrated DNA  
4 Technologies (Coralville, IA). Negative control RNA was purchased from Qiagen (Hilden,  
5 Germany). Oligos were transfected into GSC827 and TS603 cell lines using  
6 Lipofectamine RNAiMax transfection reagent (Invitrogen) according to the manufacturer's  
7 protocol. The siRNA sequences are shown as follows. siSLC7A11-1. F: 5'-AUG ACU  
8 GUG CUU CCA AGU -3'; siSLC7A11-1. R: 5'-GAU GCA UAC UUG GAA GCA -3';  
9 siSLC7A11-2. F: 5'-CUG UAA UGA GCU UGA UCG -3'; siSLC7A11-2. R: 5'-GAA CUU  
10 GCG AUC AAG CUC -3'; siSLC7A11-3. F: 5'-UUC UUU AUA GUU GUU CCC -3';  
11 siSLC7A11-3. R: 5'-CUG AAU UGG GAA CAA CUA -3'.

12

### 13 **Western blotting**

14 Total protein was extracted using RIPA lysis buffer (Thermo Fisher) supplemented with  
15 protease and phosphatase inhibitor cocktail (Thermo Fisher). Protein quantification was  
16 performed with the BCA Protein Assay Kit (Thermo Fisher Scientific). Equal amounts of  
17 protein were separated on NuPAGE 4-12% Bis-Tris mini gels (Life Technologies) and  
18 transferred to the membrane using the Power Blotter System (Invitrogen). The membrane  
19 was incubated with antibodies and visualized with an HRP/chemiluminescence kit  
20 (Thermo Fisher Scientific) on the ChemiDoc Imaging System (Bio-Rad). The primary  
21 antibodies used included GCLC (Abcam, ab4163, 1:1000), GCLM (Proteintech, 14241-  
22 1-AP, 1:1000), SLC7A11 (Abcam, ab37185, 1:1000), PARP (CST, 9532S, 1:1000),  
23  $\gamma$ H2A.X(CST, 7631P, 1:1000) and  $\beta$ -Actin (CST, 4970S, 1:5000).

24

### 25 **RNA extraction and quantitative real-time PCR (RT-PCR)**

26 Total RNA was extracted from cells using the RNeasy Mini Kit (Qiagen) and reverse  
27 transcribed to cDNA using Superscript IV VILO Master Mix (Thermo Fisher). Gene  
28 expression was analyzed with the Human Oxidative stress Plus PCR Array (PAHS-065YA,  
29 Qiagen) or with the SYBR Green Power Master Mix Kit (Applied Biosystems). Primers  
30 used include NFE2L2 (QT00027384), HMOX1 (QT00092645), NQO1 (QT00050281),  
31 SLC7A11 (QT00002674) and ACTB (QT00095431), purchased from QIAGEN.

1

## 2 **Chromatin Immunoprecipitation (ChIP) assay**

3 ChIP assay was performed using the ChIP-IT Express Enzymatic kit (Active Motif) as  
4 previously described (1). Control IgG and antibody targeting Nrf2 (Active Motif) were used.  
5 For PCR amplification, the following primers specific for the GCLC, GCLM and SLC7A11  
6 promoters were used. GCLC promoter, Forward: 5'- CGC AGT TGT TGT GAT ACA GCC  
7 -3', Reverse: 5'- GGA CTG AGA CTT TGC CCT AAG AA -3'. GCLM promoter, Forward:  
8 5'- ATT CCA AAC TGA GGG AGC TGT TT -3', Reverse: 5'- ATG AGT AAC GGT TAC  
9 GAA GCA CT -3'. SLC7A11 promoter, Forward: 5'- AGC TTC CCA CAA AGT CGA AG  
10 -3', Reverse: 5'- ACA TTC CTG CTT GTC TTG GT -3'. NQO1 promoter, Forward: 5'- TTT  
11 GCT GAG TCA CCA GTG C-3', Reverse: 5'- TTT GCT GAG TCA CCA GTG C -3'. The  
12 input DNA of each sample was used as a control.

13

## 14 **Caspase 3/7 activity assay**

15 Caspase 3/7 activity was measured using the Caspase-Glo 3/7 Assay (Promega). 10,000  
16 Cells were seeded in 96-well plate and treated with DMSO, 30 nM triptolide or triptolide  
17 combined with 0.1 mg/mL catalase for 24 hr. Luminescence was generated by adding  
18 caspase-3/7 substrate and measured by Epoch plate reader.

19

## 20 **Annexin V/PI apoptosis assay**

21 Cell apoptosis was analyzed with the Annexin-V/PI Kit (Thermo Fisher) according to the  
22 manufacturer's protocol. Cells were treated with DMSO, 30 nM triptolide, or triptolide  
23 combined with 0.1 mg/mL catalase for 96 hr. Cells were harvested and stained with FITC  
24 labeled Annexin-V and P.I. (Invitrogen) for 20 min on ice. Cell samples were analyzed by  
25 the FACSCanto II flow cytometer (B.D.).

26

## 27 **Glutathione assay**

28 Total glutathione and oxidized glutathione disulfide (GSSG) were measured with the  
29 GSH/GSSG-Glo Assay Kit (Promega) following the manufacturer's instructions. Total  
30 glutathione minus GSSG equals reduced glutathione (GSH). Ten thousand cells were  
31 seeded to a 96-well plate and treated with DMSO, 30 nM triptolide or triptolide combined

1 with 0.1mg/mL catalase for 24 hr. Luminescence was measured with a microplate reader  
2 and normalized to the protein quantification.

3

#### 4 **ROS assay**

5 ROS levels were measured using the ROS-Glo H<sub>2</sub>O<sub>2</sub> Assay kit (Promega) and CM-  
6 H<sub>2</sub>DCFDA (Life Technologies) according to the manufacturer's instructions. For ROS-Glo  
7 H<sub>2</sub>O<sub>2</sub> Assay, cells were incubated with an H<sub>2</sub>O<sub>2</sub> substrate, which can generate a luciferin  
8 precursor. After adding the luciferin detection reagent, luminescence was measured using  
9 a microplate reader and normalized to the protein levels. For CM-H<sub>2</sub>DCFDA, cells were  
10 resuspended in PBS containing ten μM CM-H<sub>2</sub>DCFDA at 37 °C for 15 min. Cells were  
11 analyzed by a FACSCanto II flow cytometer (B.D.).

12

#### 13 **DNA damage assay**

14 DNA damage level was evaluated using DNA fragmentation, 8-oxoguanine level, and  
15 comet assay. For DNA fragmentation assay, 300-500 ng of genomic DNA was resolved  
16 by electrophoresis on 4-20% TBE gel (Invitrogen). The gel was then stained with SYBR  
17 Safe and visualized on the Bio-Rad ChemiDoc Imaging System. The level of 8-oxoG was  
18 measured using the DNA/RNA Oxidative Damage ELISA Kit (Cayman) according to the  
19 manufacturer's protocol. An alkaline Comet assay was performed as previously described  
20 (2). In brief, cells were resuspended in agarose, spread on glass slides, and lysed in lysis  
21 buffer overnight at 4°C. Electrophoresis was performed at a voltage of 1 V/cm for 20 min.  
22 After electrophoresis, DNA was stained by SYBR Safe and visualized by fluorescence  
23 microscopy. The tail moment was measured and quantified by the OpenComet plugin of  
24 ImageJ software (3).

25

#### 26 **Cell proliferation**

27 Cell proliferation was analyzed using the Click-iT EdU Alexa Fluor 488 Imaging Kit  
28 (Invitrogen), following the manufacturer's instructions. Fifteen thousand cells were  
29 seeded to μ-slide 8-well chambered coverslips and treated with DMSO or 30 nM triptolide  
30 for 24 hr after plating. After washing with PBS, cells were incubated with 10 μM EdU for  
31 2 hr, and DNA was stained by Hoechst 33342. The cells labeled 488 azide were defined

1 as EdU positive cells. Images were taken by Zeiss LSM710 confocal microscope, and ten  
2 random fields were analyzed using ImageJ software.

3

#### 4 **Lipid peroxidation assay**

5 Lipid peroxidation was detected using the Image-iT™ Lipid Peroxidation Kit (Invitrogen).  
6 Fifteen thousand cells were seeded to  $\mu$ -slide 8-well chambered coverslips and treated  
7 by DMSO, 30 nM triptolide, or triptolide combined with 0.1 mg/mL catalase for 24 hr. Live  
8 cells were stained with 10  $\mu$ M dye for 30 min, and DNA was stained by Hoechst 33342  
9 for 5 min. Images were taken using a Zeiss LSM710 confocal microscope. Five random  
10 fields were analyzed using ImageJ software.

11

#### 12 **Limited dilution assay**

13 Cells were counted and plated at clonal density for a limited dilution assay (125, 62, ...,  
14 2 cells/well in 96-well plates). Cells were treated with DMSO or 30 nM triptolide for three  
15 weeks and analyzed under a microscope. Cell clusters larger than 100  $\mu$ m in diameter  
16 were defined as positive cells. The negative rate for each sample was calculated.

17

#### 18 **Sphere formation assay**

19 Five thousand cells were seeded in 6-well plates and cultured in single-cell suspension  
20 for the sphere formation assay. Cells were treated with DMSO, 30 nM triptolide, or 60 nM  
21 triptolide for two weeks to allow sphere formation. Phase-contrast images were taken.  
22 Spheres were counted from 10 random fields.

23

#### 24 **Cell viability assay**

25 8,000 to 10,000 cells per well were seeded in 96-well plate. Cell viability was evaluated  
26 using Cell Counting Kit-8 (Dojindo) according to the manufacturer's instructions.  
27 Absorbance was measured at 450 nm using an Epoch plate reader (BioTek).

28

#### 29 **Immunohistochemistry and TUNEL assay**

30 Immunohistochemistry was performed in tumor sections. The sections were  
31 deparaffinized and rehydrated, and antigen retrieval was conducted by boiling in citrate

1 buffer (pH 6.0) for 5 min. The sections were incubated with primary antibodies overnight  
2 at 4 °C, followed by HRP labeled secondary antibody at room temperature for 30 min.  
3 Bound antibodies were visualized using a DAB kit. The primary antibodies used include  
4 Nrf2 (CST, 1:1000), SLC7A11(Abcam, 1:500), GCLC (Abcam, 1:500), Ki67 (Abcam,  
5 1:1,000) and PCNA (Santa Cruz, 1:1,000). TUNEL assay was performed using the  
6 DeadEnd Colorimetric TUNEL System (Promega) following the manufacturer's protocol.  
7 The slides were detected using DAB and counterstained using hematoxylin.

8

1 **SI Figures**

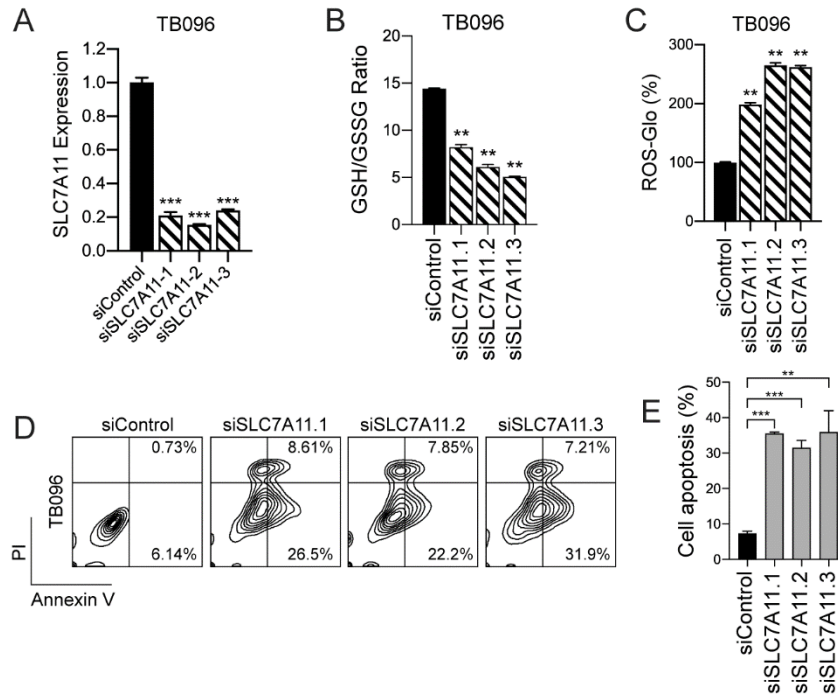

2

3 **Fig. S1. (A)** RT-PCR measured the siRNA knockdown efficiency of SLC7A11 in TB096  
 4 cells. \*\*\* $p < 0.001$ . **(B)** GSH/GSSG-Glo assay measured the GSH/GSSG ratio in TB096  
 5 after siRNA knockdown of SLC7A11. \*\* $p < 0.01$ . **(C)** ROS-Glo H<sub>2</sub>O<sub>2</sub> assay measured the  
 6 ROS level in TB096 cells after depletion of SLC7A11. \*\* $p < 0.01$ . **(D)** Cell apoptosis assay  
 7 using Annexin V and PI staining in TB096 cells after depletion of SLC7A11. **(E)**  
 8 Quantification of apoptotic cells in Fig. S1D. \*\*\* $p < 0.001$ , \*\* $p < 0.01$ .

1

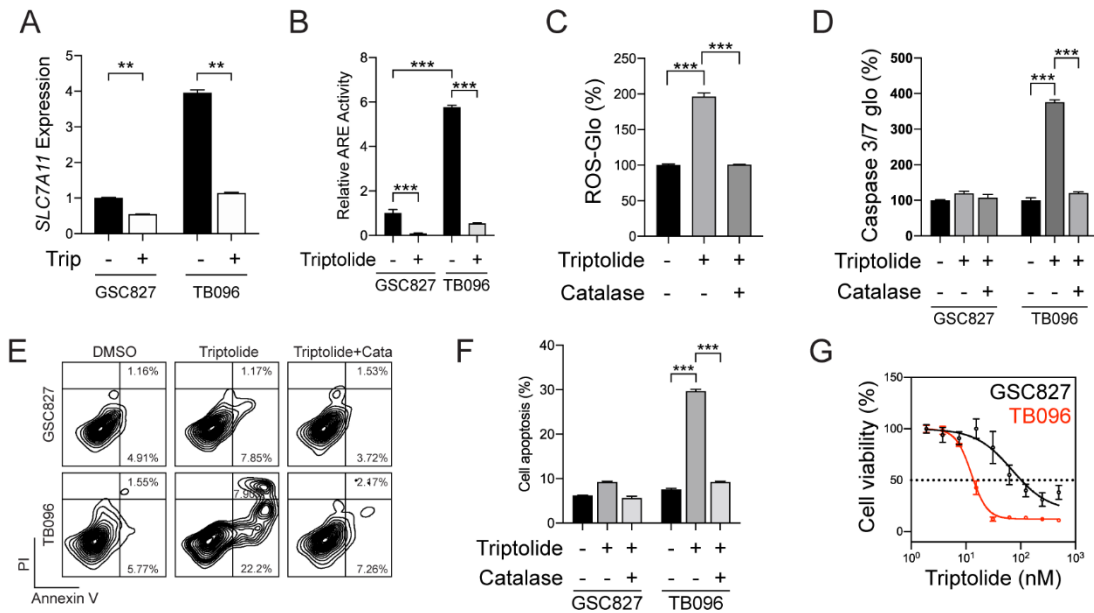

2

3

4 **Fig. S2. (A)** RT-PCR measured SLC7A11 expression in GSC827 and TB096 after treated  
 5 with triptolide (30 nM, 24 hr). \*\*p<0.01. **(B)** Luciferase reporter assay measured the ARE-  
 6 driven transcriptional activity in GSC827 and TB096 cells. \*\*\*p<0.001. **(C)** ROS-Glo H<sub>2</sub>O<sub>2</sub>  
 7 assay measured the ROS level in TB096 cells after treated with triptolide. \*\*\*p<0.001. **(D)**  
 8 Caspase 3/7-Glo assay measured the caspase 3/7 activity in GSC827 and TB096 after  
 9 treated with triptolide. \*\*\*p<0.001. **(E)** Cell apoptosis assay using Annexin V and PI  
 10 staining in GSC827 and TB096 after treated with triptolide. Cata, Catalase. **(F)**  
 11 Quantification of apoptotic cells in Fig. S2F. \*\*\*p<0.001. **(G)** Dose response cell viability  
 12 assay using CCK8 assay in GSC827 and TB096 cells after treated with different doses  
 13 of triptolide.

14



1 **References:**

- 2 1. Liu Y, *et al.* (2020) Targeting NRF2-Governed Glutathione Synthesis for SDHB-  
3 Mutated Pheochromocytoma and Paraganglioma. *Cancers (Basel)* 12(2):280.
- 4 2. Olive PL & Banáth JP (2006) The comet assay: a method to measure DNA damage  
5 in individual cells. *Nat. Protoc.* 1(1):23-29.
- 6 3. Lu Y, Liu Y, & Yang C (2017) Evaluating In Vitro DNA Damage Using Comet Assay.  
7 *Journal of visualized experiments : JoVE* (128):56450.

8
